# Supplementary material for: Ultrashort-range, high-frequency communication by female mice shapes social interactions
Source: PubMed Central journal article supplement (PMC7021676; doi:10.1038/s41598-020-59418-0), 2020-02-14
Supplement: 41598_2020_59418_MOESM1_ESM.pdf [file 41598_2020_59418_MOESM1_ESM.pdf]

Supplementary Information

**Title:**

Ultrashort-range, high-frequency communication by female mice shapes social interactions.

**Authors:**

Warren, M.R.<sup>1</sup>, Clein, R.S.<sup>1</sup>, Spurrier, M.S.<sup>1</sup>, Roth, E.D.<sup>1</sup>, and Neunuebel, J.P.<sup>1</sup> \*

**Affiliations:**

<sup>1</sup> Dept. of Psychological and Brain Sciences, University of Delaware, Newark, Delaware, USA

\* Correspondence and requests for materials should be addressed to [jneun@udel.edu](mailto:jneun@udel.edu).

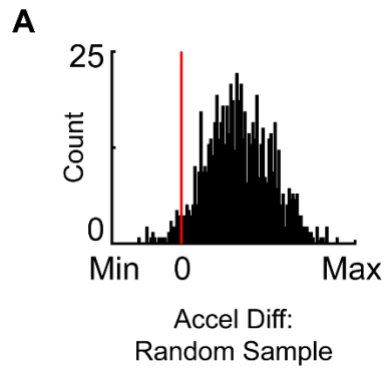

**Supplementary Figure 1. Controlling for significance of behavioral response to temporally isolated signals.** Corresponding to the data in **Figure 4B**; Bootstrap resampling revealed robust changes in a male's acceleration when the female vocalizer was moving faster. A thousand unique subsamples were generated, with the number of data points per sample equaling 25 percent of the total examples. The acceleration difference between vocal and non-vocal trajectories (vocal minus non-vocal) was calculated for each subsample (black bars show distribution), and the overall distribution of differences was compared to zero (vertical line). Gray line =  $p > 0.05$ ; red line =  $p < 0.05$ .

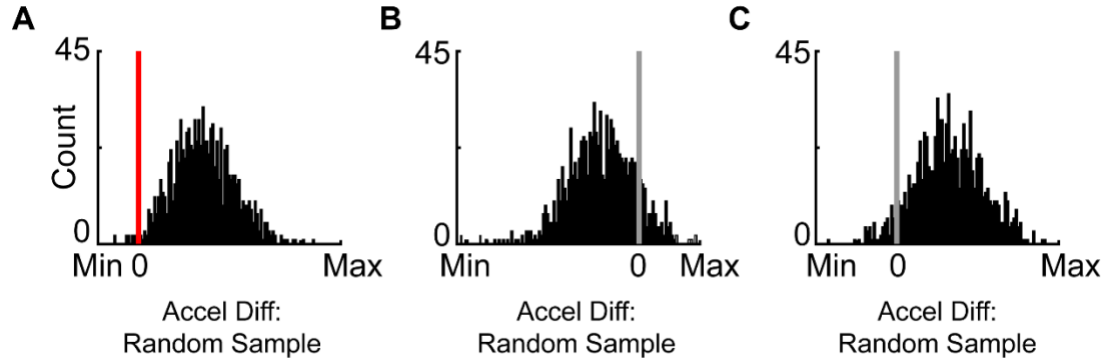

**Supplementary Figure 2. Controlling for significance of behavioral response to all vocal signals.** **A-C**, Bootstrap resampling revealed that the significant changes in a receiver's acceleration when the vocalizer was moving faster (**Figure 5C**) persisted regardless of the sample size. In contrast, the significant changes in a receiver's acceleration when the vocalizer was moving slower (**Figure 5D,F**) disappeared when accounting for sample size. A thousand unique subsamples were generated, with the number of data points per sample matching the number of temporally-isolated signals emitted in the same condition. The acceleration difference between vocal and non-vocal trajectories (vocal minus non-vocal) was calculated for each subsample (black bars show distribution), and the overall distribution of differences was compared to zero (vertical line). Gray line =  $p > 0.05$ ; red line =  $p < 0.05$ . FF = same sex; MF = opposite sex; F Voc = female vocalizer, M Voc = male vocalizer; F Rec = female receiver, M Rec = male receiver.

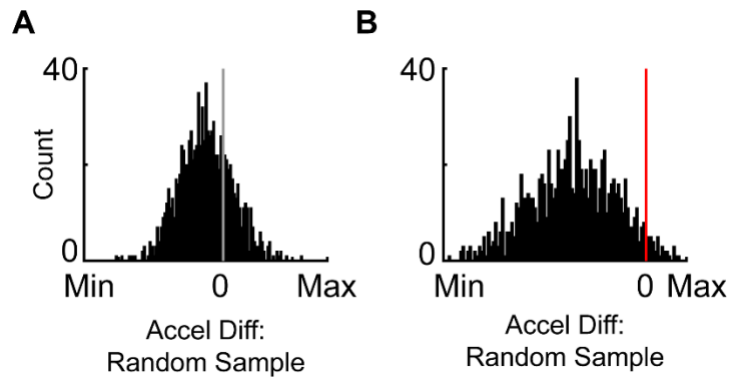

**Supplementary Figure 3. Controlling for significance of behavioral response over time.** Corresponding to the data in **Figure 6A,C**; Bootstrap resampling revealed no significant changes in a female's acceleration during the last ten minutes (epoch 3) after her female social partner vocalized while traveling faster. However, males showed a robust behavioral response to female-emitted signals during the first ten minutes (epoch 1) while the female traveled faster. A thousand unique subsamples were generated, with the number of data points per sample equaling 25 percent of the total examples. The acceleration difference between vocal and non-vocal trajectories (vocal minus non-vocal) was calculated for each subsample (black bars show distribution), and the overall distribution of differences was compared to zero (vertical line). Gray line =  $p > 0.05$ ; red line =  $p < 0.05$ .
